# Supplementary material for: Functional Activation of Osteoclast Commitment in Chronic Lymphocytic Leukaemia: a Possible Role for RANK/RANKL Pathway
Source: PubMed Central journal article supplement (PMC5658396; doi:10.1038/s41598-017-12761-1), 2017-10-26
Supplement: 41598_2017_12761_MOESM1_ESM.pdf [file 41598_2017_12761_MOESM1_ESM.pdf]

# Functional Activation of Osteoclast Commitment in Chronic Lymphocytic Leukaemia: a Possible Role for RANK/RANKL Pathway.

Cecilia Marini<sup>1,2,3,\*</sup>, Silvia Bruno<sup>4</sup>, Francesco Fiz<sup>3,5</sup>, Cristina Campi<sup>6</sup>, Roberta Piva<sup>3</sup>, Giovanna Cutrona<sup>7</sup>, Serena Matis<sup>7</sup>, Alberto Nieri<sup>3</sup>, Maurizio Miglino<sup>8</sup>, Adalberto Ibatici<sup>9</sup>, Anna Maria Orengo<sup>2</sup>, Anna Maria Massone<sup>6</sup>, Carlo Emanuele Neumaier<sup>10</sup>, Daniela de Totero<sup>11</sup>, Paolo Giannoni<sup>12</sup>, Matteo Bauckneht<sup>3</sup>, Michele Pennone<sup>2</sup>, Claudya Tenca<sup>4</sup>, Elena Gugiatti<sup>4</sup>, Alessandro Bellini<sup>3</sup>, Anna Borra<sup>3</sup>, Elisabetta Tedone<sup>9</sup>, Hülya Eftürk<sup>2,3</sup>, Francesca Rosa<sup>10</sup>, Laura Emionite<sup>13</sup>, Michele Cilli<sup>13</sup>, Davide Bagnara<sup>4,14</sup>, Valerio Brucato<sup>15</sup>, Paolo Bruzzi<sup>16</sup>, Michele Piana<sup>6,17</sup>, Franco Fais<sup>4,7</sup>, Gianmario Sambuceti<sup>2,3</sup>.

<sup>1</sup> CNR Institute of Bioimages and Molecular Physiology, Milan, Italy.

<sup>2</sup> Nuclear Medicine IRCCS AOU San Martino-IST, Genoa, Italy

<sup>3</sup> Nuclear Medicine, Department of Health Science, University of Genova, Genoa, Italy.

<sup>4</sup> Department of Experimental Medicine, University of Genova, Genoa, Italy.

<sup>5</sup> Nuclear Medicine Unit, Department of Radiology, Uni-Klinikum Tuebingen, Germany.

<sup>6</sup> SPIN Institute, CNR, Genoa, Italy.

<sup>7</sup> Molecular Pathology, IRCCS AOU San Martino-IST, Genoa, Italy.

<sup>8</sup> Department of Internal Medicine, University of Genova, Genoa, Italy.

<sup>9</sup> Haematology Clinic, IRCCS AOU San Martino-IST, Genoa, Italy.

<sup>10</sup> Radiology Unit, IRCCS AOU San Martino-IST, Genoa, Italy.

<sup>11</sup> Transfer Gene Laboratory, IRCCS AOU San Martino-IST, Genoa, Italy.

<sup>12</sup> Stem Cell Laboratory, Department of Experimental Medicine, University of Genova, Genoa, Italy

<sup>13</sup> Animal Facility, IRCCS AOU San Martino-IST, Genoa, Italy.

<sup>14</sup> Karches Center for Oncology Research, Feinstein Institute for Medical Research, Northwell Health, Manhasset, NY, USA

<sup>15</sup> Department of Civil, Environmental, Aerospace, Materials Engineering (DICAM), Aten Center, CHAB pole, University of Palermo, Italy.

<sup>16</sup> Epidemiology and Clinical trial Service, IRCCS AOU San Martino-IST, Genoa, Italy.

<sup>17</sup> Department of Mathematics (DIMA), University of Genova, Genoa, Italy.

## \*Corresponding author:

Dr. Cecilia Marini  
C/o Nuclear Medicine Unit  
Department of Health Sciences  
Pad. Sommariva, IRCCS San Martino – IST  
Largo Rosanna Benzi 10, 16132 Genoa, Italy  
E-Mail : [Cecilia.marini@unige.it](mailto:Cecilia.marini@unige.it)  
Secondary E-Mail: C1570@unige.it

**Total word count (manuscript): 4945**

**Word Count (Abstract): 190**

**Disclosures:** The authors declare no competing financial interests.

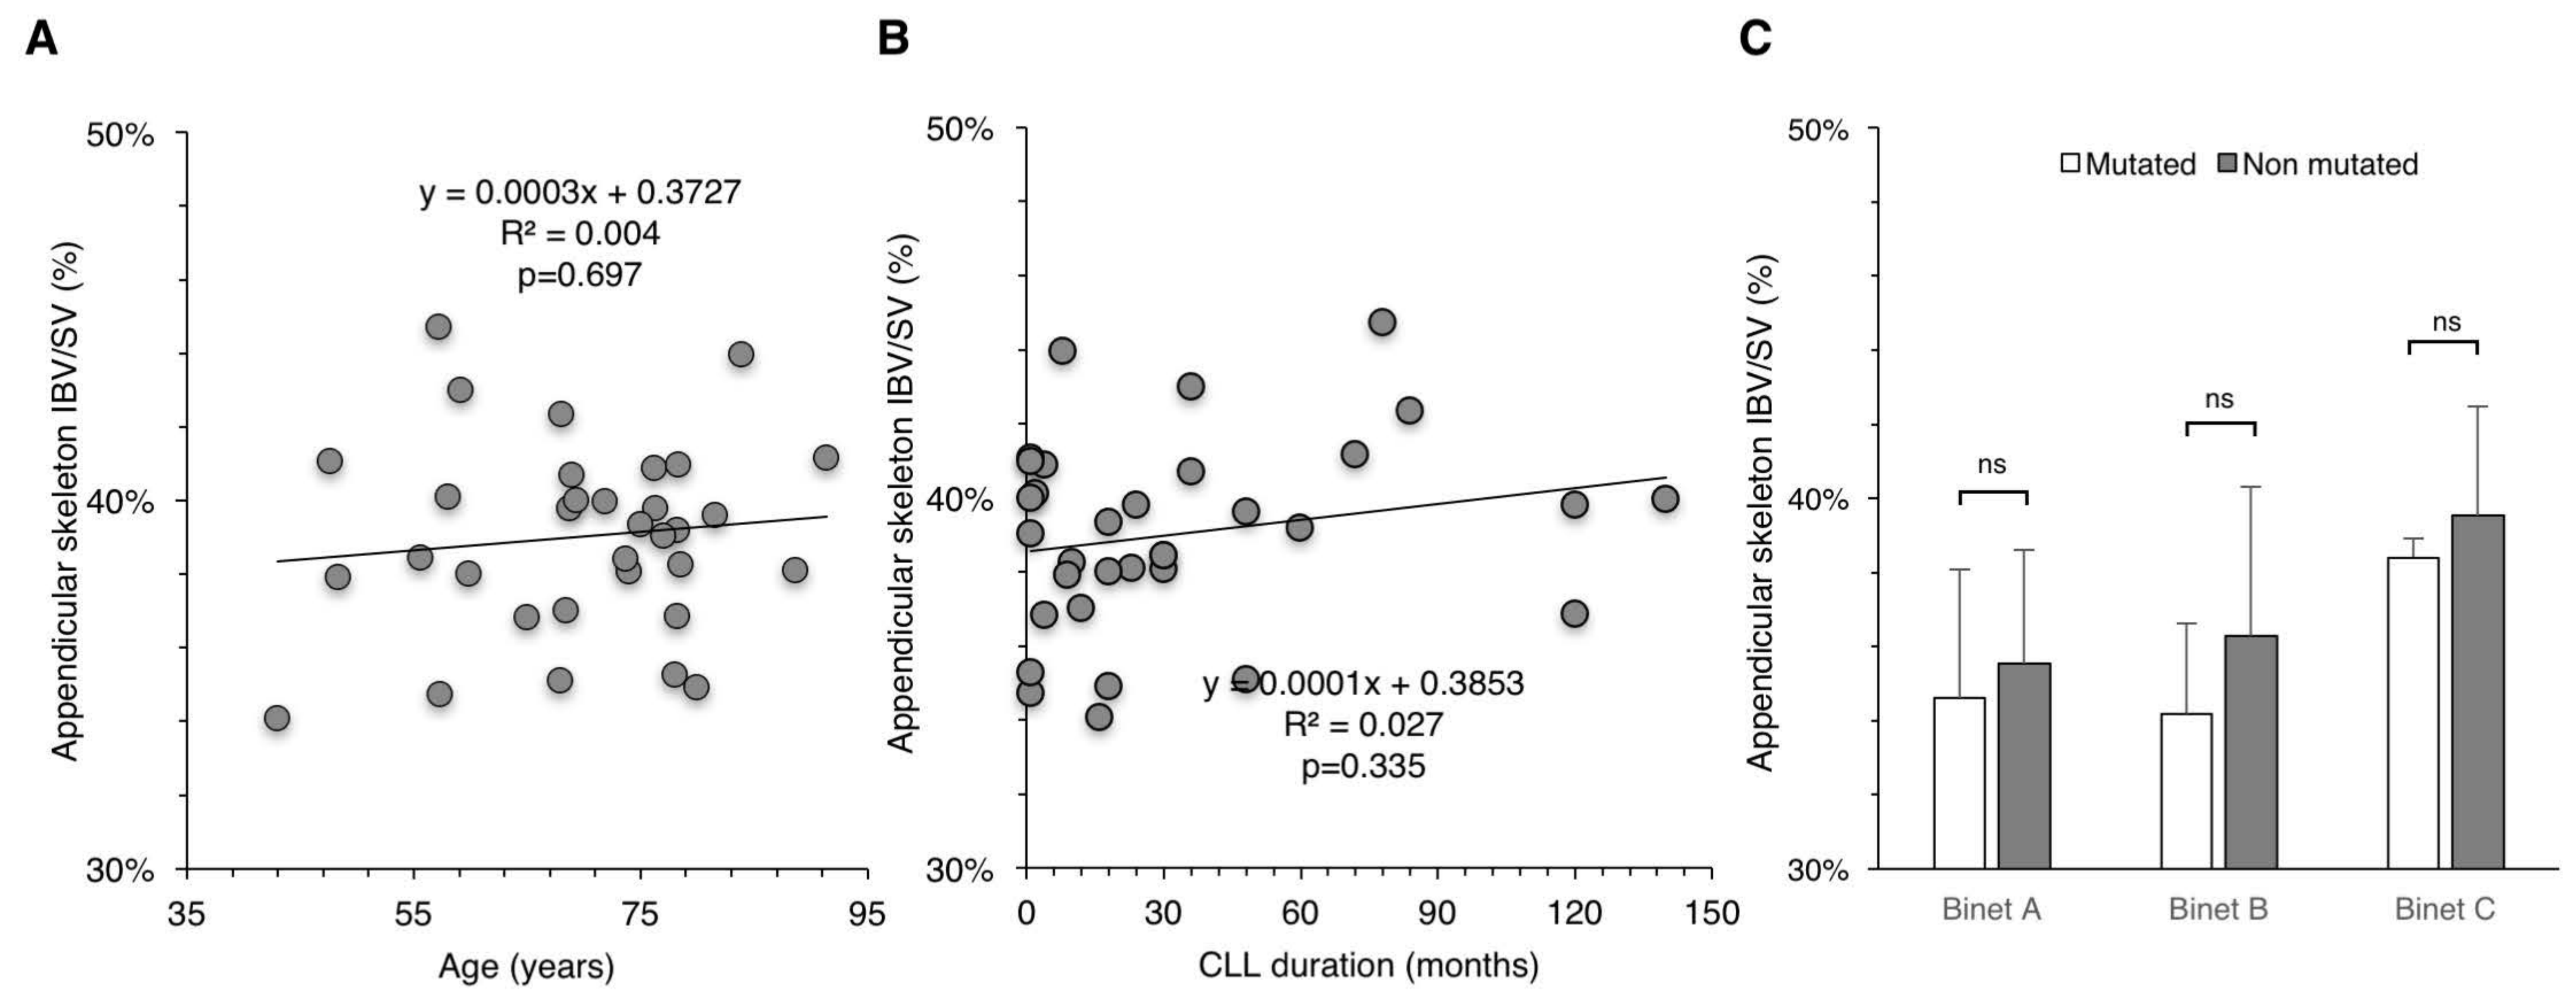

Lack of correlation between IBV/SV ratio in the appendicular skeleton (Y axis) and patient age (panel A), time gap between disease diagnosis and study date (panel B). Similarly, as displayed in panel C, <2% cells with IgHV mutation (grey columns, non mutated) did not identify a higher bone erosion with respect to low risk pattern.

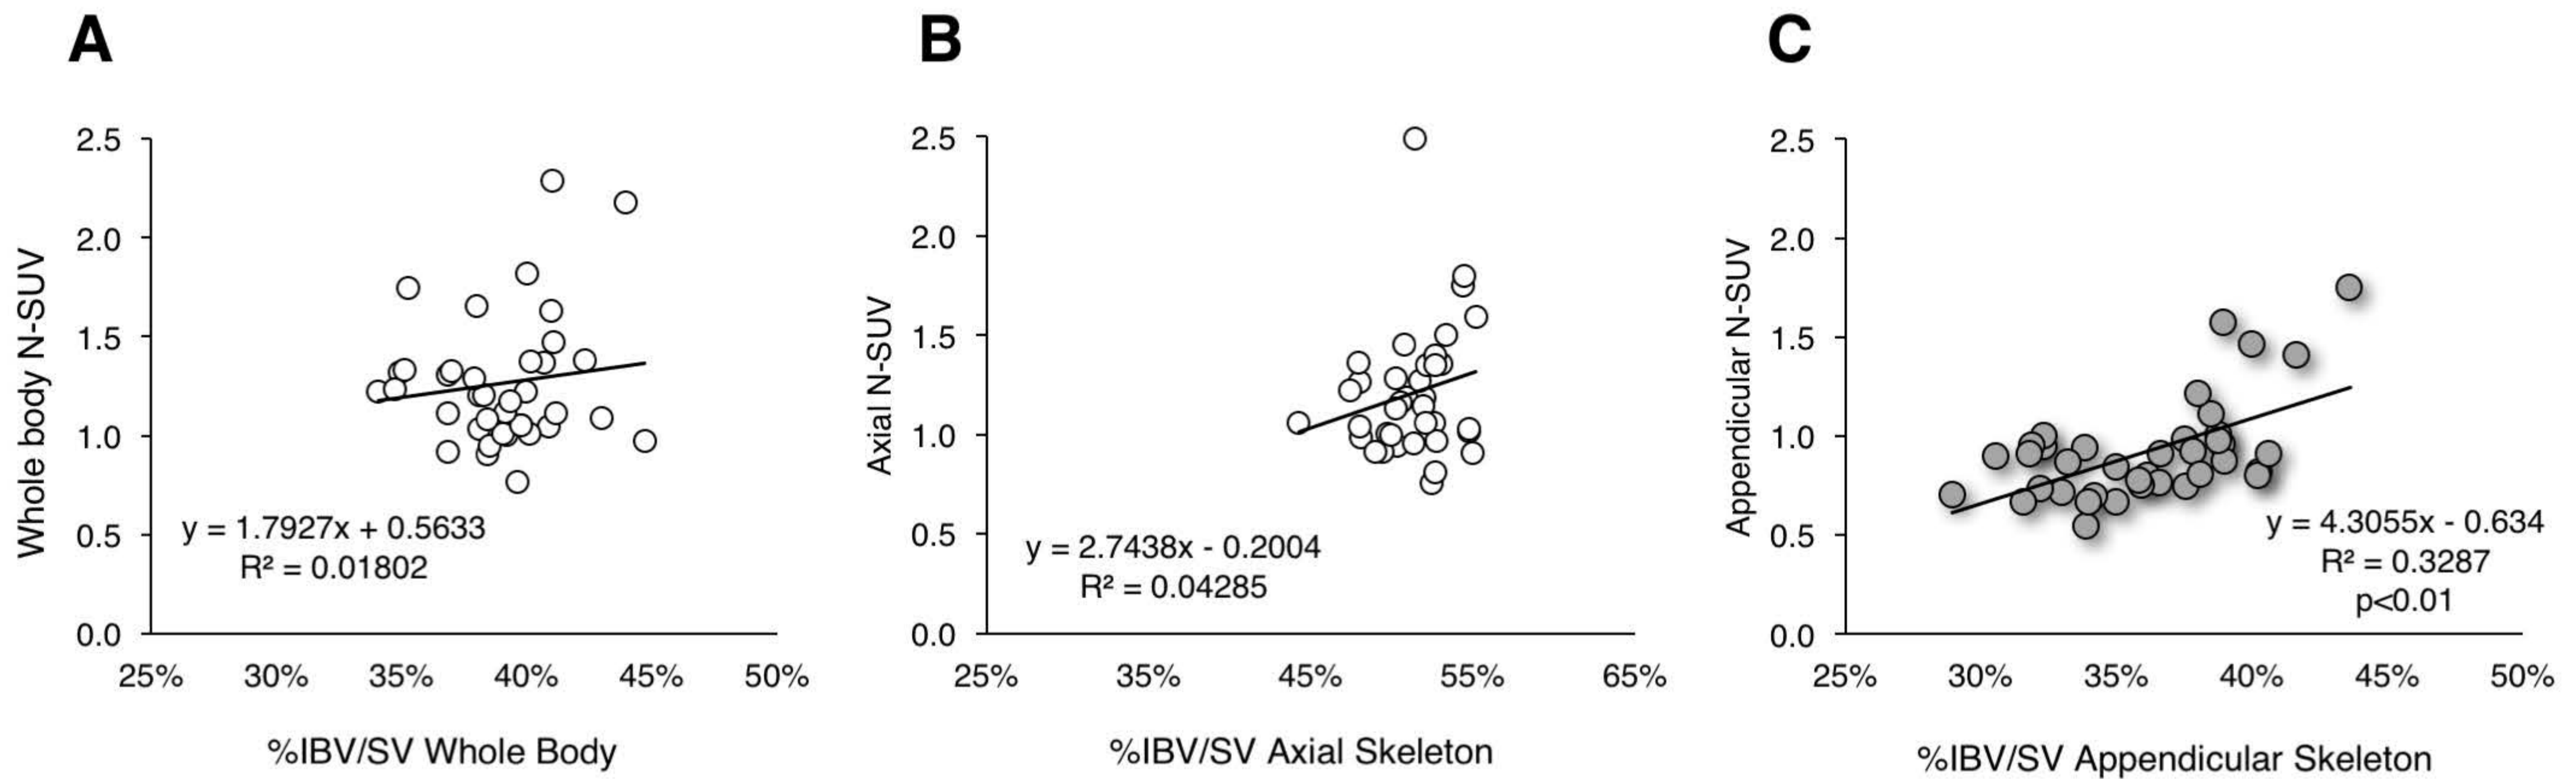

The metabolic activation of RBM was not related to bone erosion, estimated by IBV/SV ratio, when the whole (panel A) or axial skeleton (Panel B) were analysed. By contrast, these two variables were strictly correlated within the appendicular bones (Panel C).

## CLL-treated (FW 1)

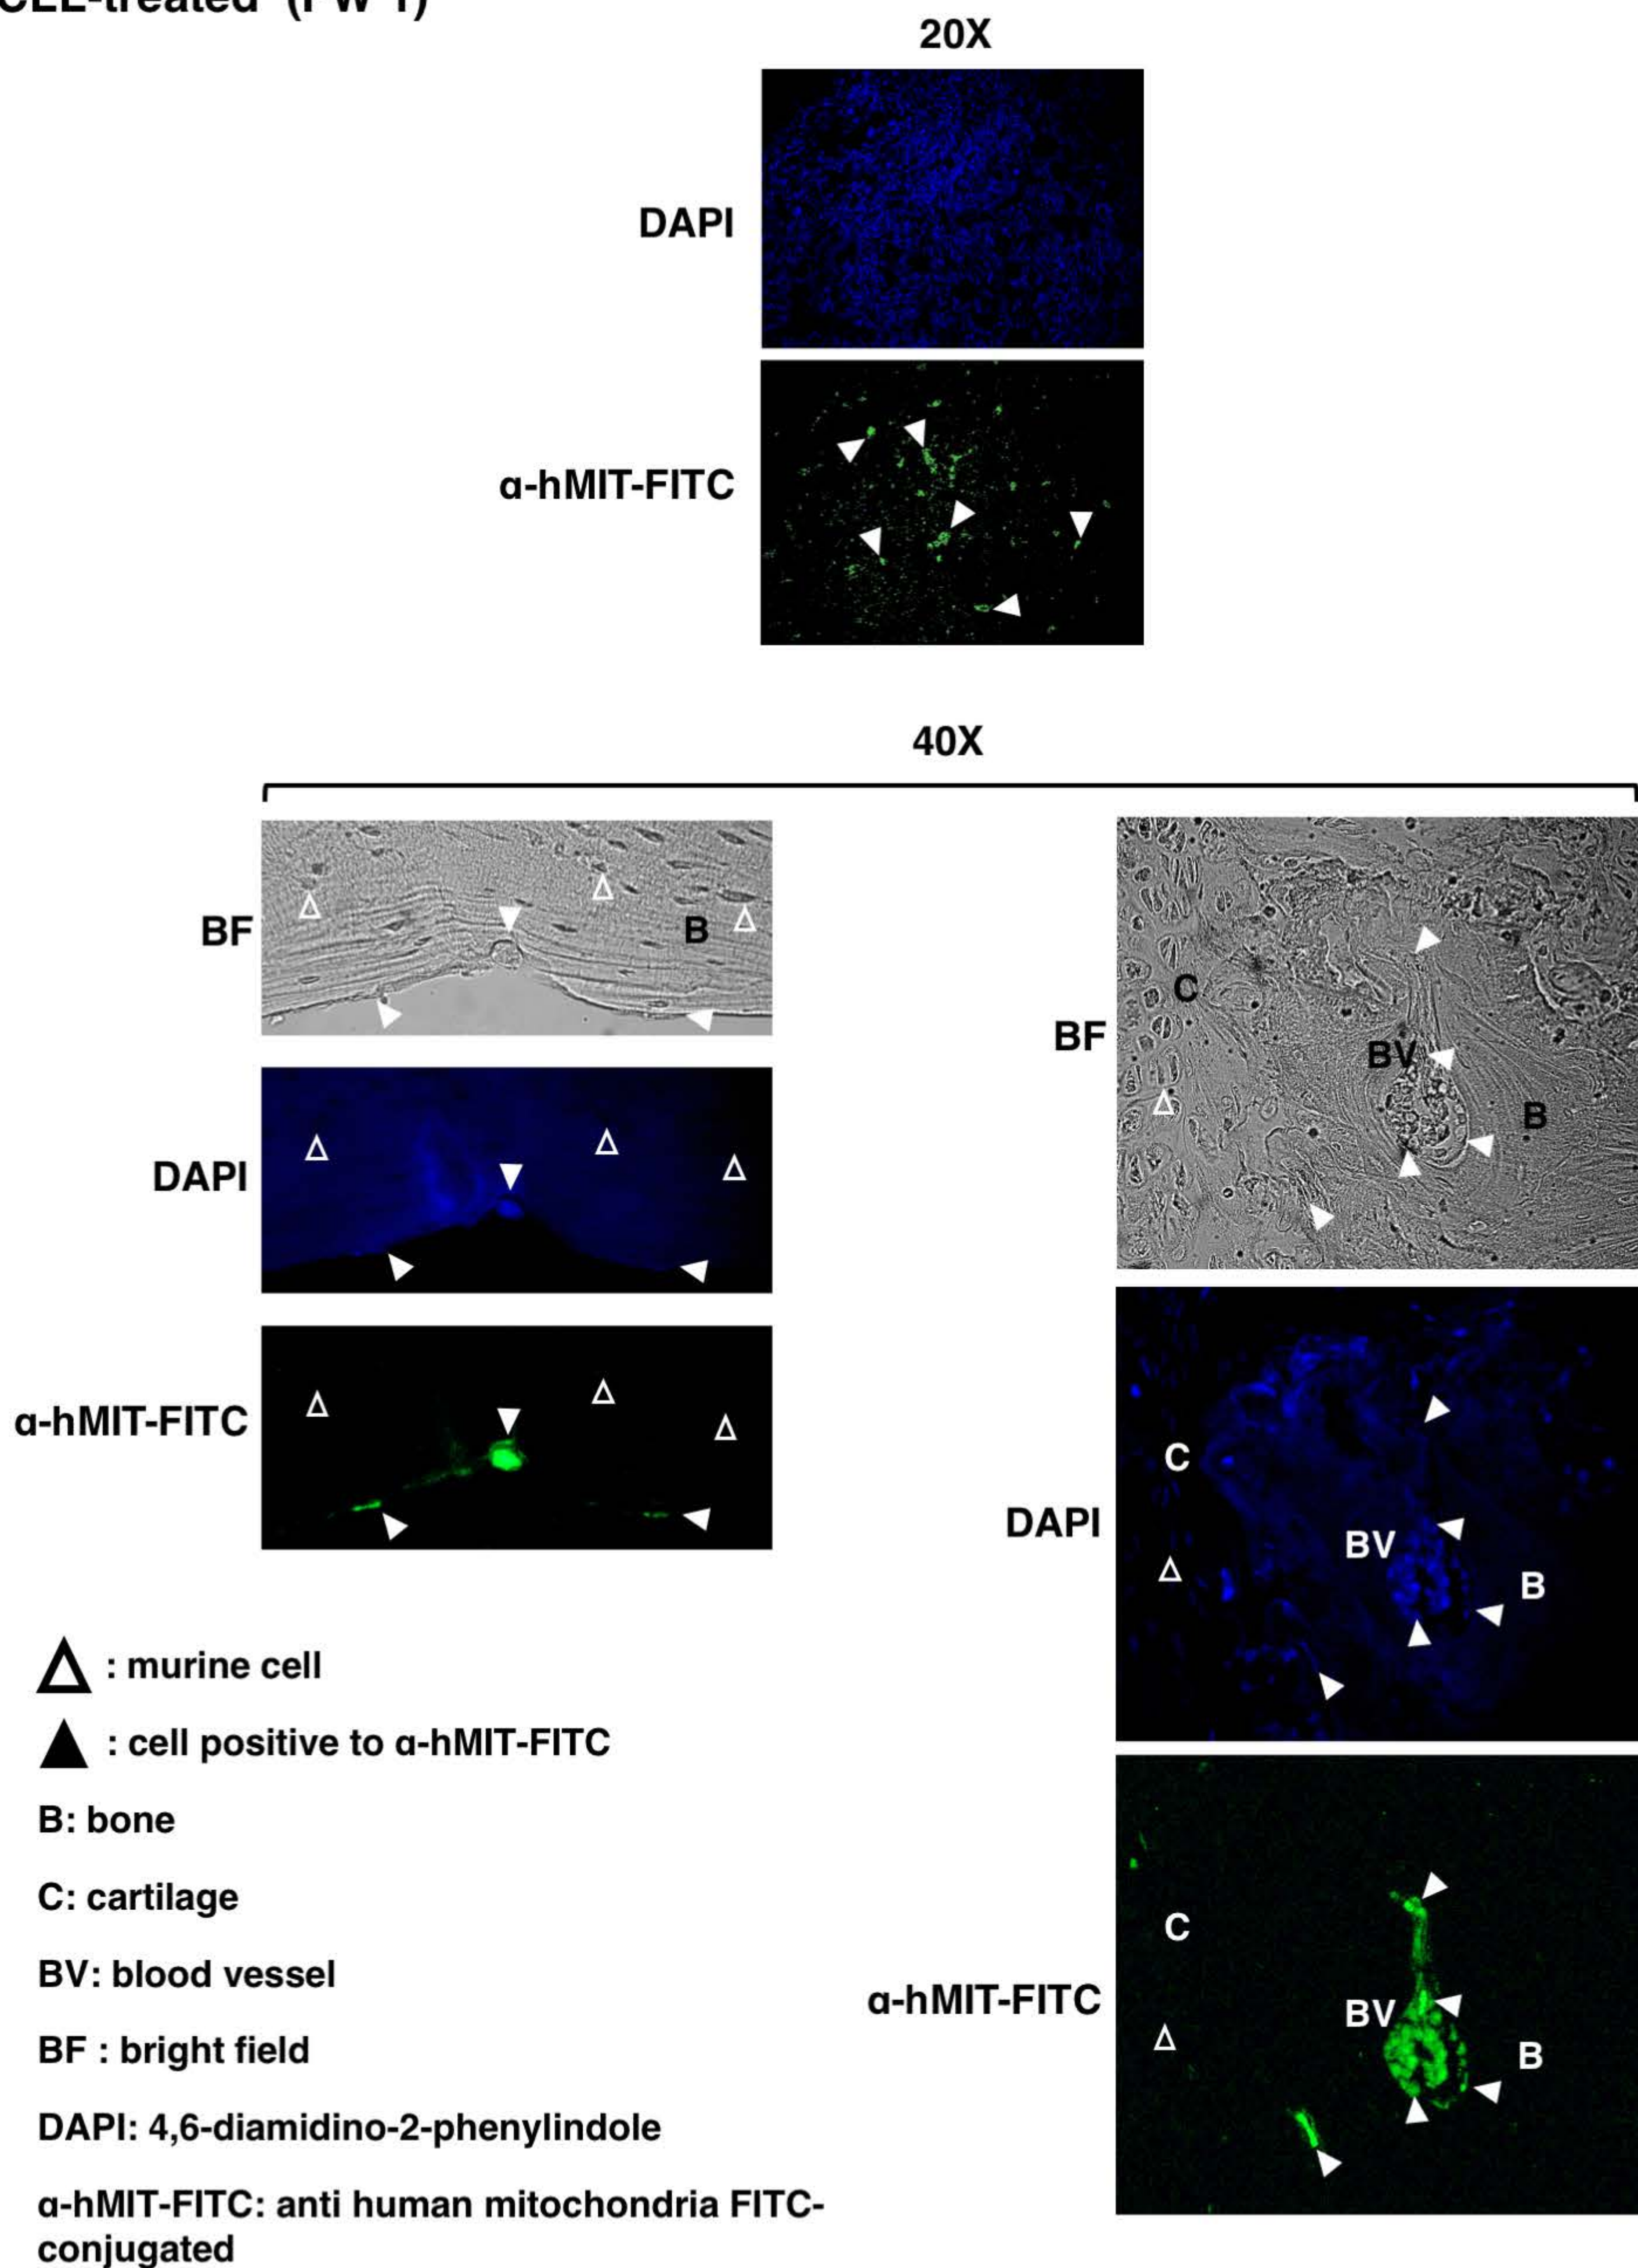

**Supplementary Figure 3:** Immuno-fluorescence images of a xenograft CLL untreated mouse. At small magnification, imaging with 4,6-diamidino-2-phenylindole (DAPI) and α-hMIT-FITC: anti human mitochondria FITC-conjugated documents the presence of human mitochondria among nucleated cells in mouse bone marrow. This localization is confirmed a higher magnification (40x) in which mouse and human cells are identified.

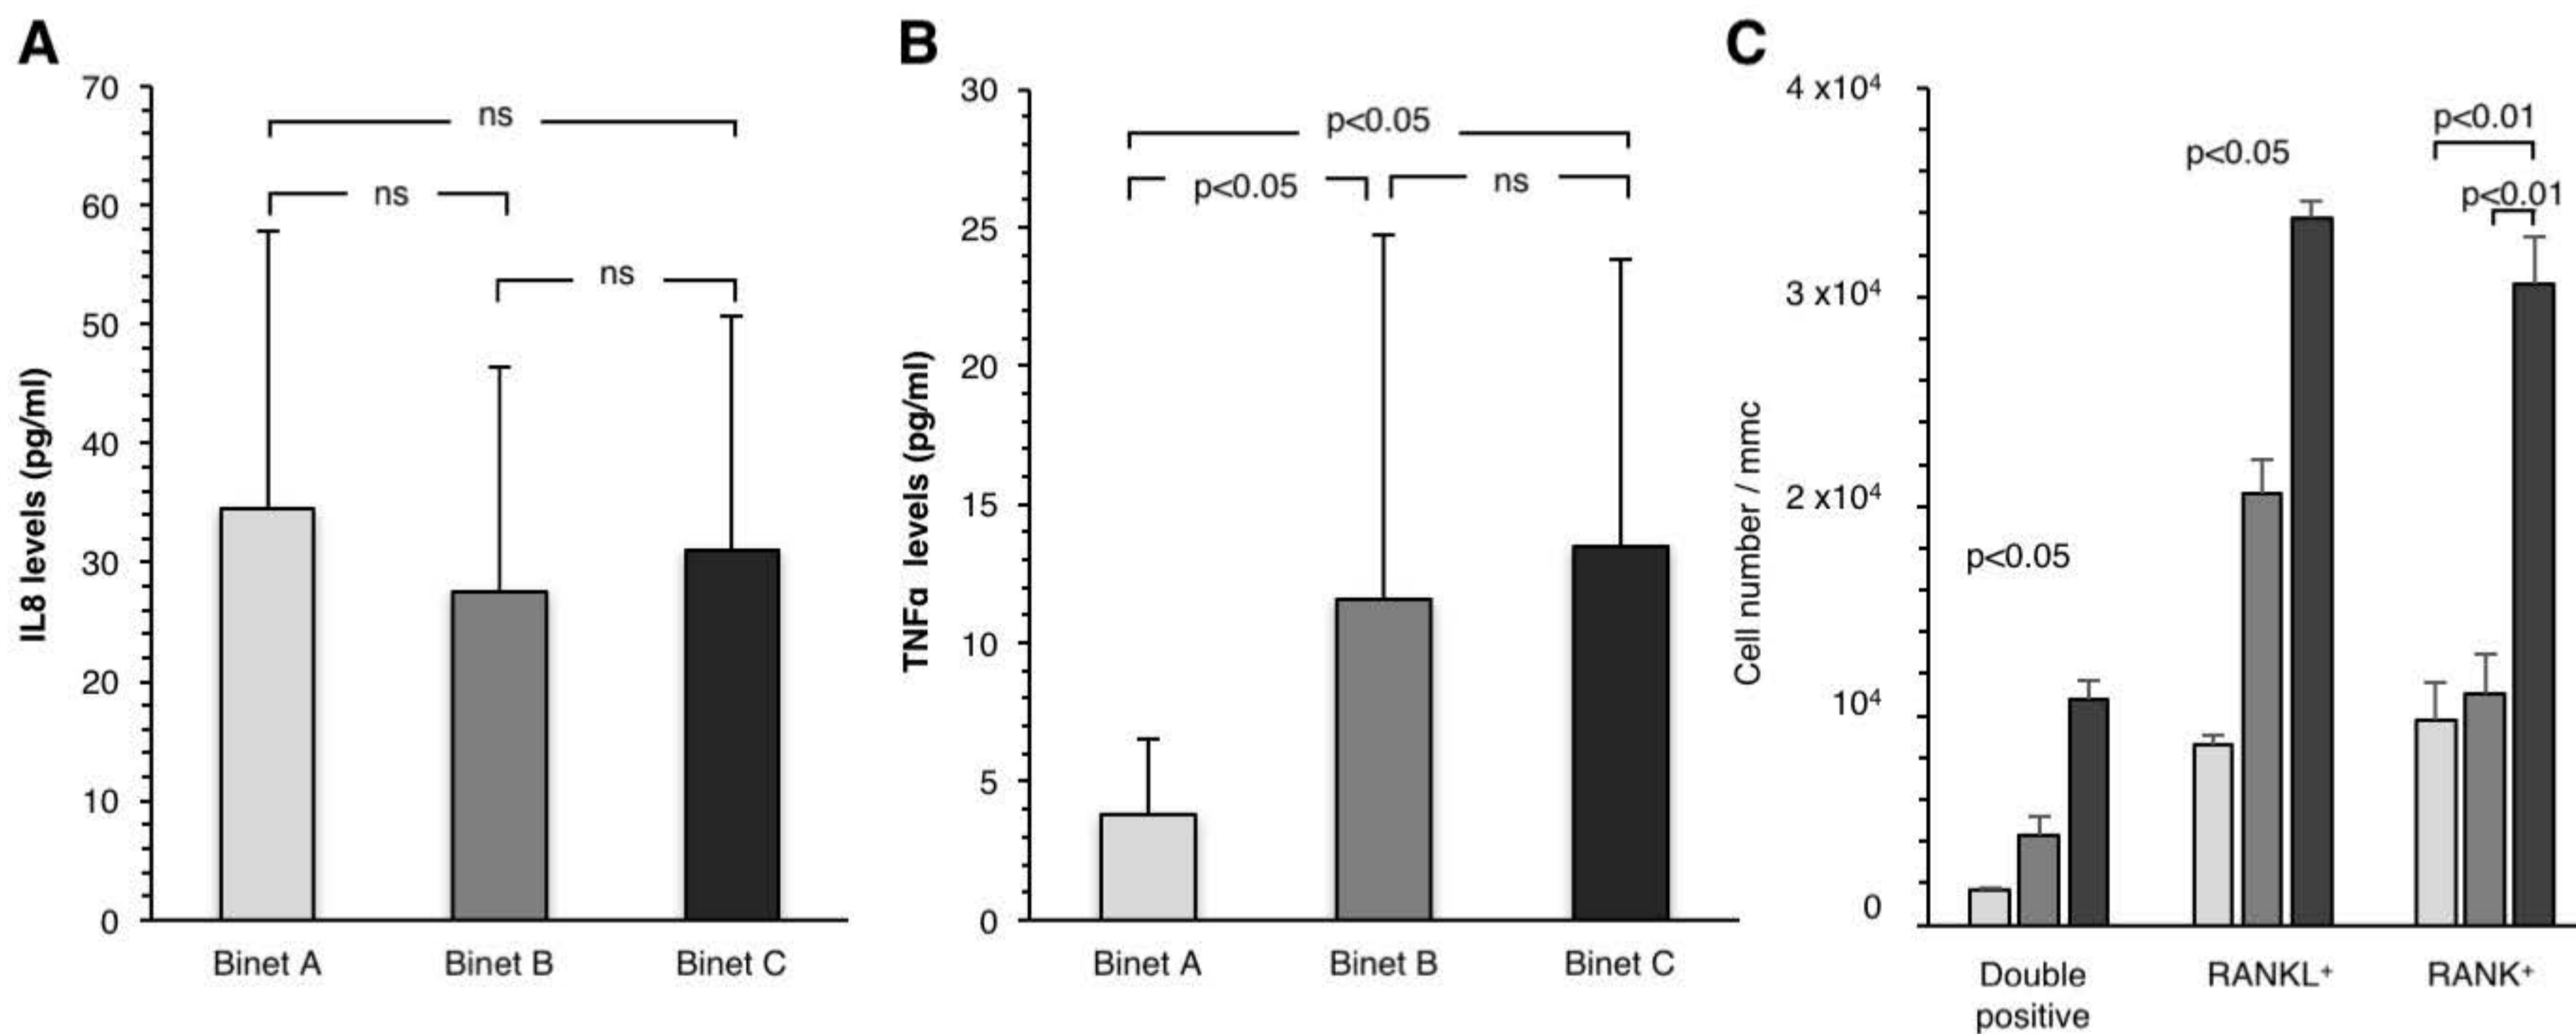

Serum levels of IL8 (panel A) and TNF $\alpha$  (panel B) in Binet A, B and C patients (means  $\pm$  standard deviation). Panel C displays means and SEM values of total number of peripheral blood RANK $^+$ , RANKL $^+$  and double positive (DP) leukemic cells/mmc, reported separately for Binet A (pale grey), B (grey) or C (dark grey) patients;
